# Supplementary material for: Effects of an aged tissue niche on the immune potency of dendritic cells using simulated microgravity
Source: PubMed Central journal article supplement (PMC10314949; doi:10.1038/s41514-023-00111-7), 2023-07-01
Supplement: 41514_2023_111_MOESM1_ESM.pdf [file 41514_2023_111_MOESM1_ESM.pdf]

## Supplementary Information

### Effects of an aged tissue niche on the immune potency of dendritic cells using simulated microgravity

Mei ElGindi<sup>1</sup>, Jiranuwat Sapudom<sup>1</sup>, Anna Garcia Sabate<sup>1</sup>, Brian Chesney Quartey<sup>1</sup>, Aseel Alatoon<sup>1</sup>, Mohamed Al-Sayegh<sup>2</sup>, Rui Li<sup>4</sup>, Weiqiang Chen<sup>3,4</sup>, Jeremy Teo<sup>1,3,4,\*</sup>.

1. Laboratory for Immuno Bioengineering Research and Applications, Division of Engineering, New York University Abu Dhabi, Abu Dhabi POBox 129188, United Arab Emirates
2. Biology Division, New York University Abu Dhabi, P.O. Box 129188, Abu Dhabi, United Arab Emirates
3. Department of Mechanical and Aerospace Engineering, New York University, 6 MetroTech Center, Brooklyn, NY, 11201 USA
4. Department of Biomedical Engineering, New York University, 6 MetroTech Center, Brooklyn, NY, 11201 USA

\*Correspondence: [jeremy.teo@nyu.edu](mailto:jeremy.teo@nyu.edu); Tel.: +971-2-6286689

**Supplementary Table 1:** Antibodies used for flow cytometry in this study

| <b>Marker</b> | <b>Fluorochrome</b>  | <b>Host/Target</b> | <b>Isotype</b> | <b>Clone</b> | <b>Catalog Number</b> |
|---------------|----------------------|--------------------|----------------|--------------|-----------------------|
| CD11c         | PerCP                | Mouse anti-Human   | IgG1, κ        | Bu15         | 337234                |
| CCR7          | Alexa Fluor 488      | Mouse anti-Human   | IgG2a, κ       | G043H7       | 353206                |
| HLADR         | Brilliant Violet 421 | Mouse anti-Human   | IgG2a, κ       | L243         | 307636                |
| CD80          | Brilliant Violet 711 | Mouse anti-Human   | IgG1, κ        | 2D10         | 305236                |
| CD86          | Brilliant Violet 605 | Mouse anti-Human   | IgG1, κ        | BU63         | 374214                |
| CD206         | Brilliant Violet 510 | Mouse anti-Human   | IgG1, κ        | 15-2         | 321138                |
| CD209         | PE                   | Mouse anti-Human   | IgG2a, κ       | 9E9A8        | 330106                |
| CD69          | APC/Cyanine7         | Mouse anti-Human   | IgG1, κ        | FN50         | 310914                |

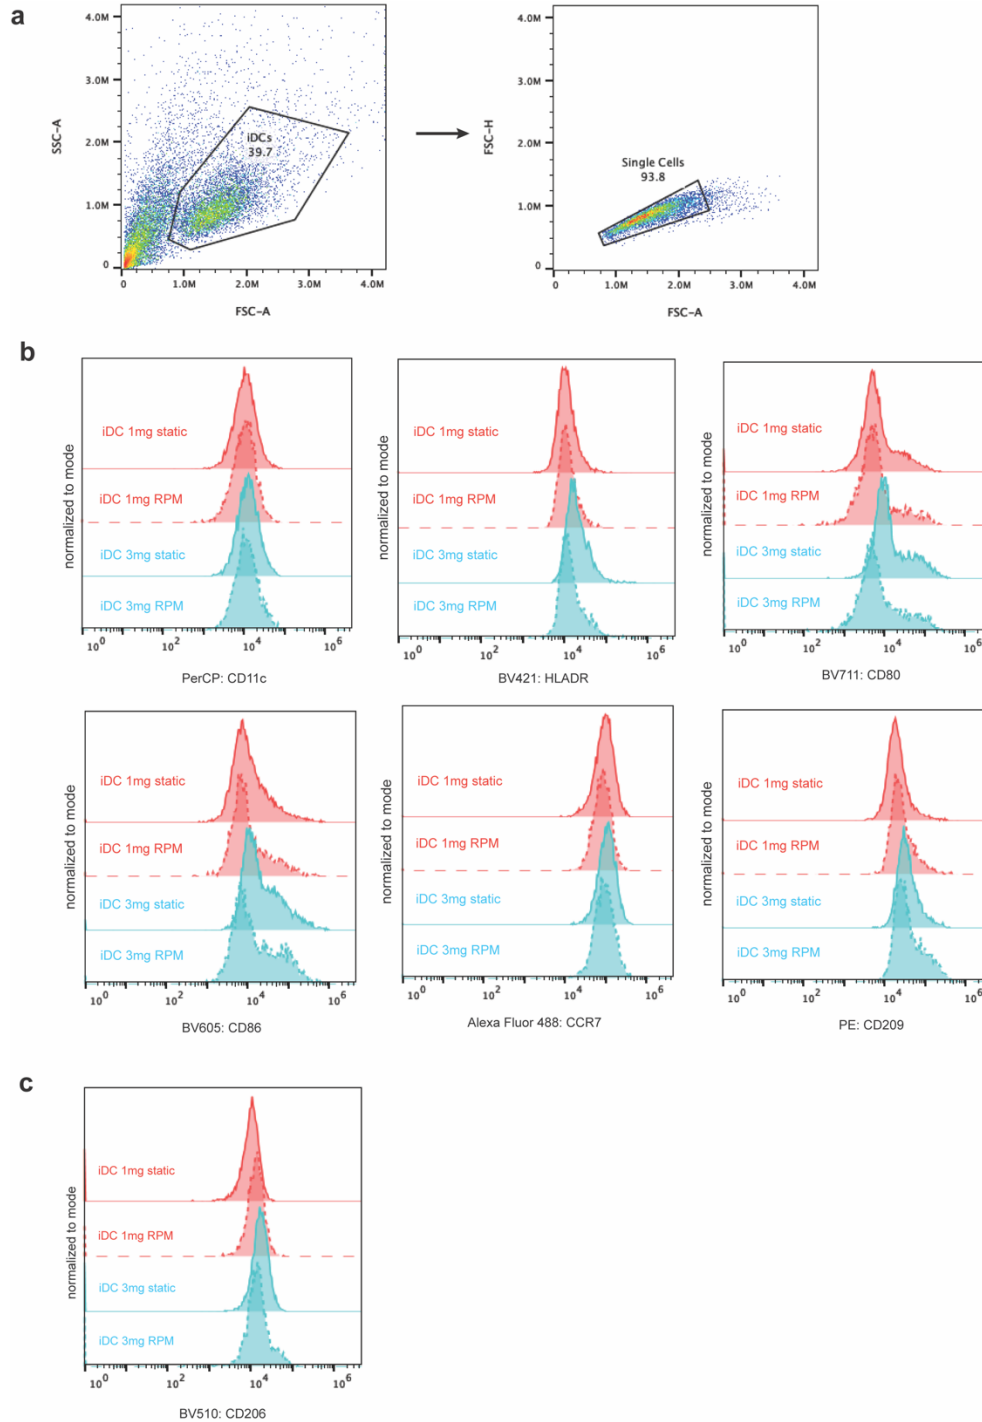

**Supplementary Figure 1:** **a.** Representative gating strategy for iDCs cultured under different conditions. Initial cell population was gated on FSC and SSC to remove cell debris and dead cells. The population was then gated to isolate single cells and remove any cell aggregates. This population was then used in the histogram analysis. **b.** Representative fluorescent histograms used in the study. This representation was used for the data analysis in Figure 2B in the manuscript. **c.** Representative fluorescent histogram of CD206 used in the study. This was used for the data analysis in Figure 3D in the manuscript.

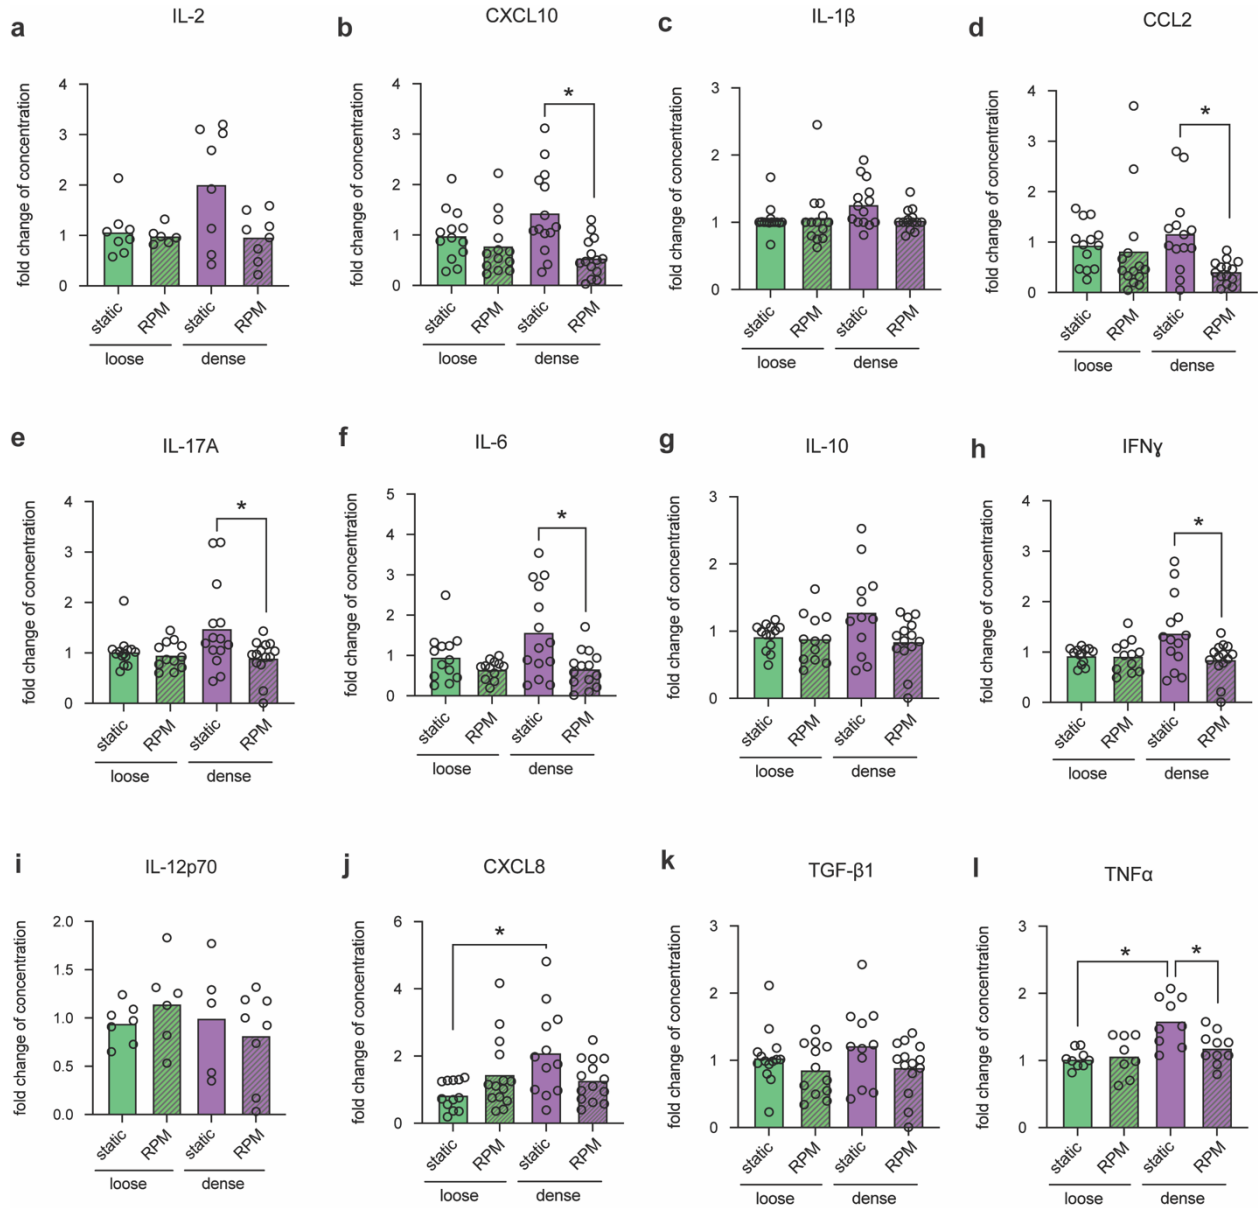

**Supplementary Figure 2:** Bar graph analysis of cytokine secretion by iDCs cultured for 3 days at static or RPM conditions in loose and dense matrices. Fold change of concentration of cytokine (pg/mL) calculated relative to samples cultured in loose matrices at static conditions.. Data are shown as mean  $\pm$  SD. \* indicates significant  $p \leq 0.05$ .

**up-regulated**

|          |          |           |        |            |
|----------|----------|-----------|--------|------------|
| ZNF740   | C16orf54 | F2RL3     | SYNPO  | ETS1       |
| FLCN     | NATD1    | SLITRK2   | ATXN2L | SFRP1      |
| TNRC6C   | ZMIZ2    | C3        | GPT2   | NPTXR      |
| NOL9     | ARAP3    | LINC00622 | RUNX2  | CYP1B1     |
| RNF149   | CLK4     | CLK1      | SLC1A4 | MRC2       |
| ZNF446   | C19orf68 | MMP14     | KCNC3  | ZFP92      |
| SAFB     | SLC45A4  | SKIL      | KLF16  | CYP1B1-AS1 |
| KIAA0930 | GBGT1    | C19orf80  | SMAD7  | MIR1286    |
| CTSD     | BRD4     | MEGF8     | SAMD1  |            |
| MPRIP    | ITGAL    | EPPK1     | PREX1  |            |

---

**down-regulated**

|             |          |         |           |          |
|-------------|----------|---------|-----------|----------|
| CXCL8       | PRDX4    | PI4K2B  | ZKSCAN4   | CCNH     |
| AKR1C1      | TRG-AS1  | TMED3   | ATP5A1    | LETM2    |
| TNFSF18     | CSF2RA   | DCUN1D5 | RIPK3     | SCP2     |
| NTAN1       | C1QBP    | GINM1   | DEPDC7    | PRMT3    |
| LYZ         | PSMD1    | CBWD2   | GABPB1    | TMEM206  |
| RBM3        | C7orf73  | PHB2    | TAF1B     | NEK3     |
| MAN1B1-AS1  | RABGAP1L | ACTR10  | POP1      | PIGC     |
| IGFBP7      | NFXL1    | ZDHHC6  | GLIPR2    | TTC19    |
| H3F3AP4     | TMA16    | SLC25A5 | LINC00641 | FAM21A   |
| APCDD1      | PPP2CA   | NRN1    | WAC-AS1   | SERPINE3 |
| MAPK8       | ACOT2    |         |           |          |
| DESI1       | CNOT8    |         |           |          |
| TSNAX       | ZNF41    |         |           |          |
| COA1        | MCPH1    |         |           |          |
| GOLGA5      | BRCC3    |         |           |          |
| ATP5B       | UBE2K    |         |           |          |
| NUPL2       | MTMR10   |         |           |          |
| SLC25A5-AS1 | OSBPL1A  |         |           |          |
| SRP54       | PRMT5    |         |           |          |
| NAPB        |          |         |           |          |

**Supplementary Figure 3:** List of genes that are up and downregulated in iDCs cultured on the RPM compared to static conditions, independently of matrix density.

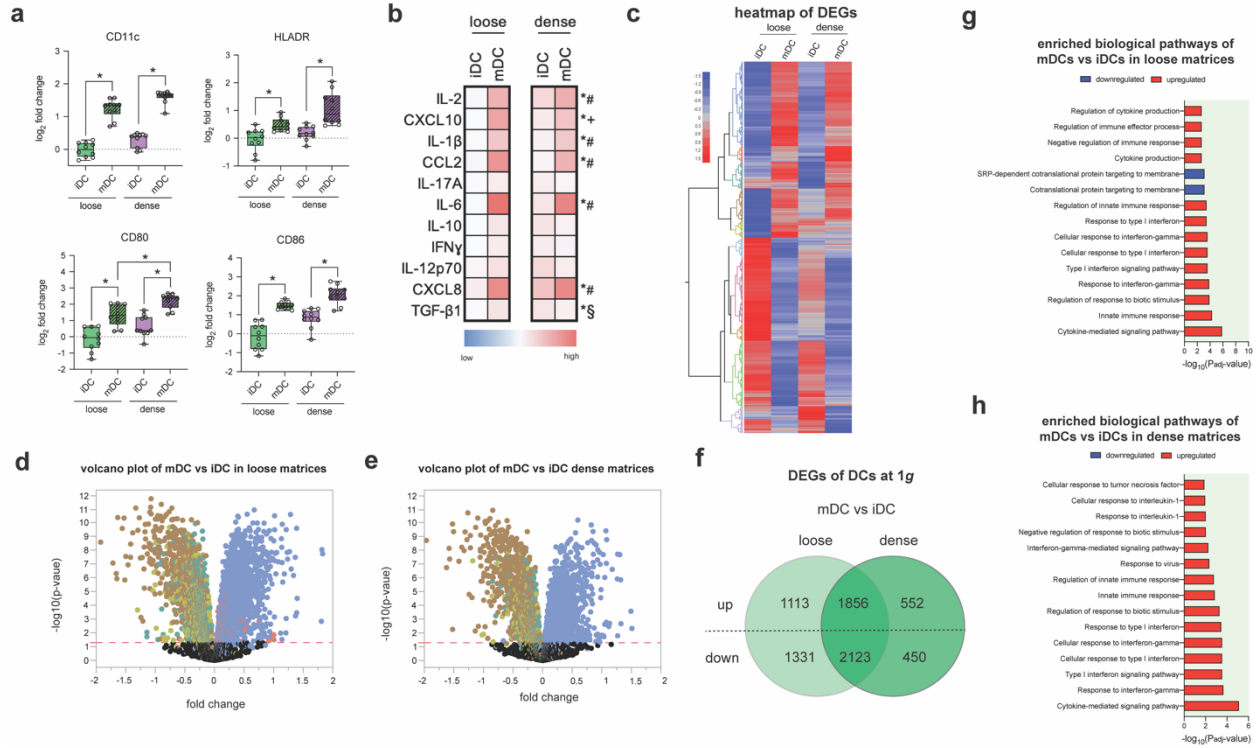

**Supplementary Figure 4: Phenotypic and transcriptome analysis of DC differentiation.** iDCs and mDCs were cultured for 3 days at static conditions in loose and dense matrices. **a.** Analysis of surface markers associated with differentiation, namely, CD11c, HLADR, CD80, and CD86 using flow cytometry. Log<sub>2</sub> fold change of gMFI was calculated relative to iDCs cultured in loose matrices at static conditions. **b.** Heat map of log<sub>2</sub> fold change of concentration of cytokine secretion by iDCs and mDCs cultured in loose and dense matrices at static conditions. Log<sub>2</sub> fold change of median concentration of cytokine (pg/mL) was calculated relative to cytokine concentration secreted by iDCs in loose matrices at static conditions. **c.** Heatmap of total DEGs in samples after RNA-sequencing analysis. Volcano plots depicting up and downregulated DEGs of mDCs compared to iDCs cultured at static conditions in **d.** loose and **e.** dense matrices compared. **f.** Venn diagram of the number of DEGs of mDCs compared to iDCs cultured in static conditions in either loose or dense matrices. Enriched biological processes pathways in mDCs compared to iDCs cultured in static conditions in **g.** loose and **h.** dense matrices. Experiments were performed with at least 3 replicates. The box and whiskers graphs used have the center line at the median value. The upper and lower bounds of the box extend from the 25<sup>th</sup> to 75<sup>th</sup> percentiles and the whiskers are plotted to the minimum and maximum values. \* indicates significant  $p \leq 0.05$ . For heatmap, \* indicates significant  $p \leq 0.05$  of samples in of mDCs in loose matrices compared to iDCs in loose matrices cultured at static conditions. # indicates significant  $p \leq 0.05$  of mDCs in dense matrices compared to iDCs in dense matrices cultured at static conditions. § indicates significant  $p \leq 0.05$  of iDCs in dense matrices compared to iDCs in loose matrices at static conditions. + indicates significant  $p \leq 0.05$  of mDCs in dense matrices compared to mDCs in loose matrices cultured at static conditions.

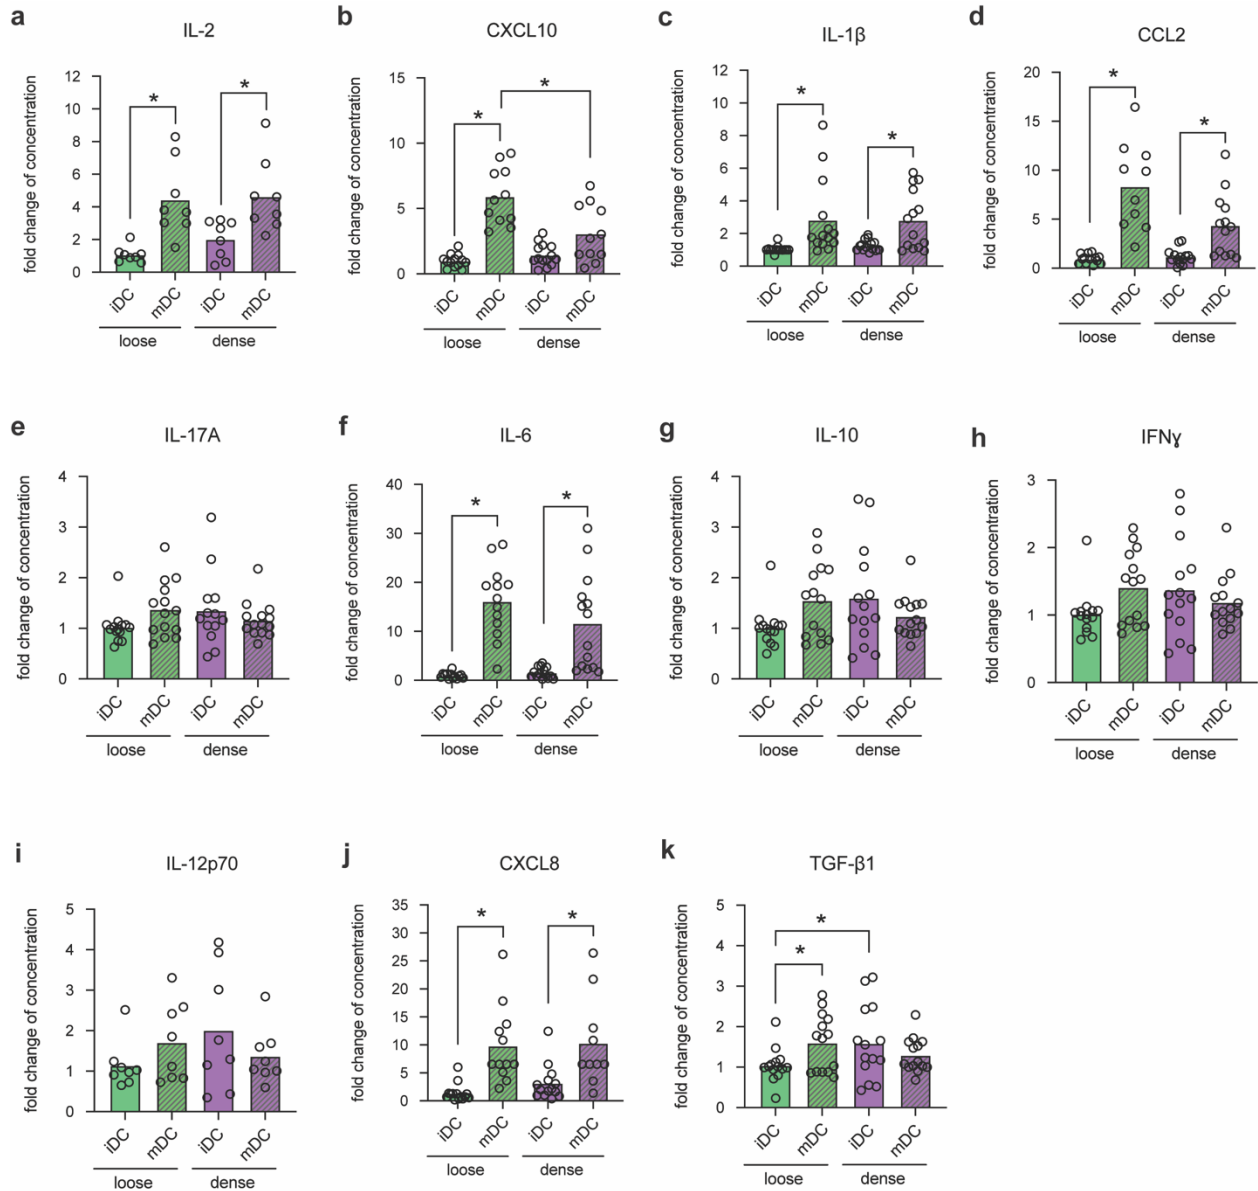

**Supplementary Figure 5:** Bar graph analysis of cytokine secretion by iDCs and mDCs cultured for 3 days at static or RPM conditions in loose and dense matrices. Fold change of concentration of cytokine (pg/mL) calculated relative to samples cultured in loose matrices at static conditions. Data are shown as mean  $\pm$  SD. \* indicates significant  $p \leq 0.05$ .

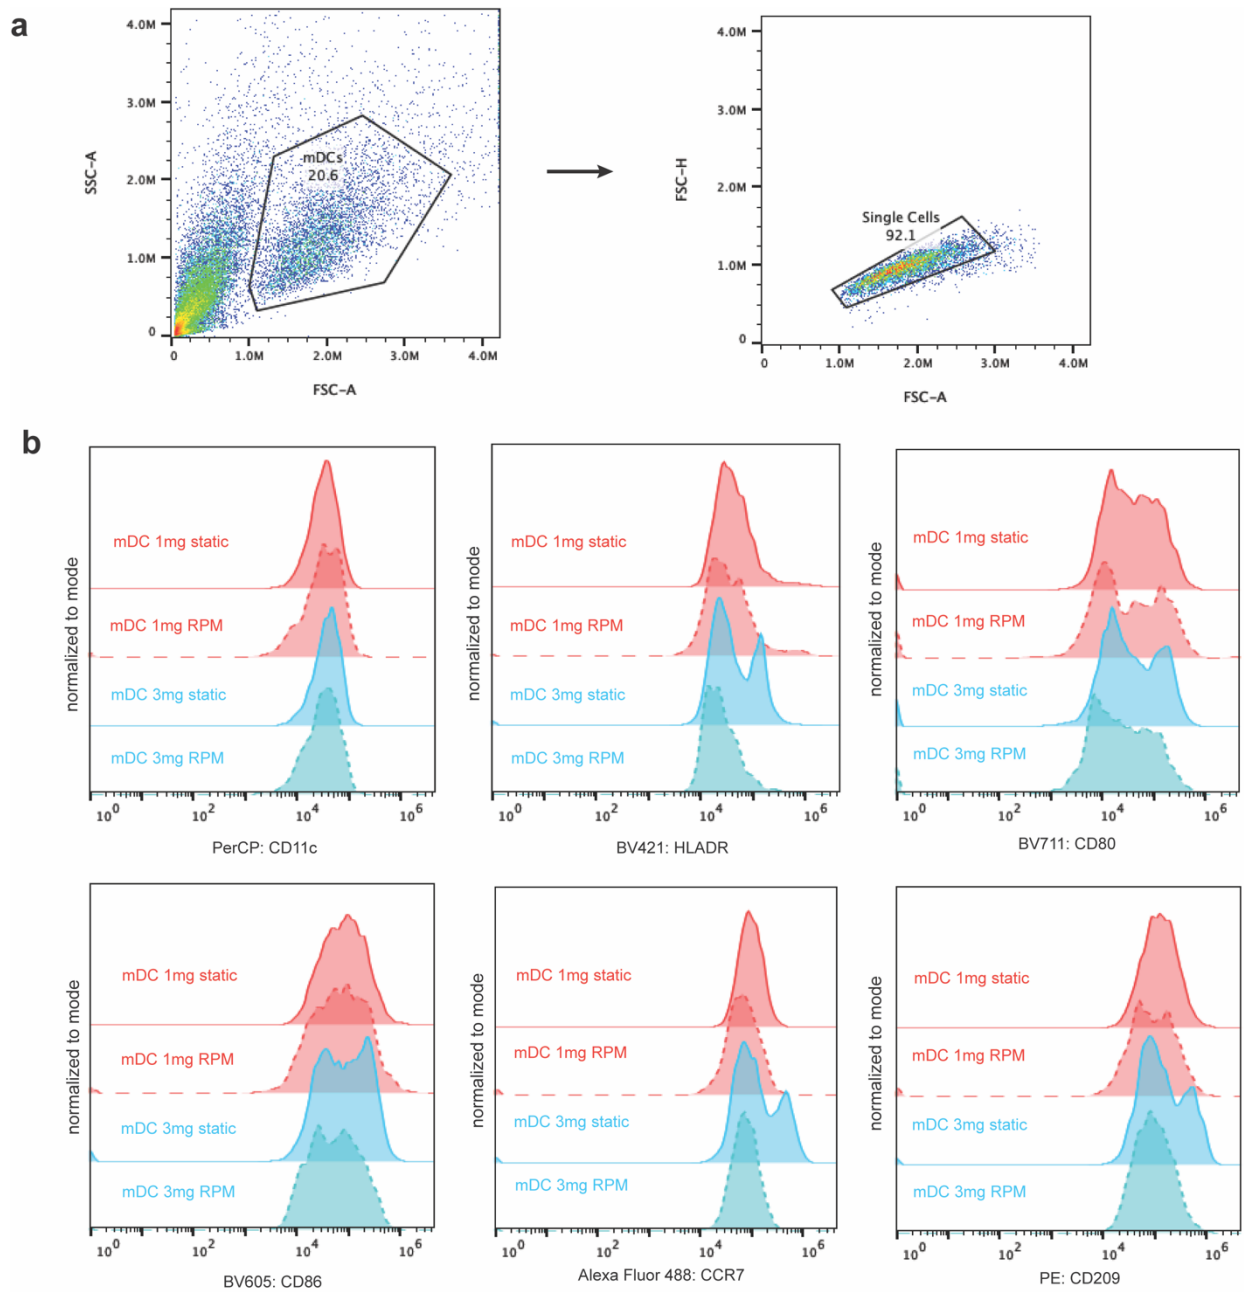

**Supplementary Figure 6: a.** Representative gating strategy for mDCs cultured under different conditions. Initial cell population was gated on FSC and SSC to remove cell debris and dead cells. The population was then gated to isolate single cells and remove any cell aggregates. This population was then used in the histogram analysis. **b.** Representative fluorescent histograms used in the study. This was used for the data analysis in Figure 5B in the manuscript.



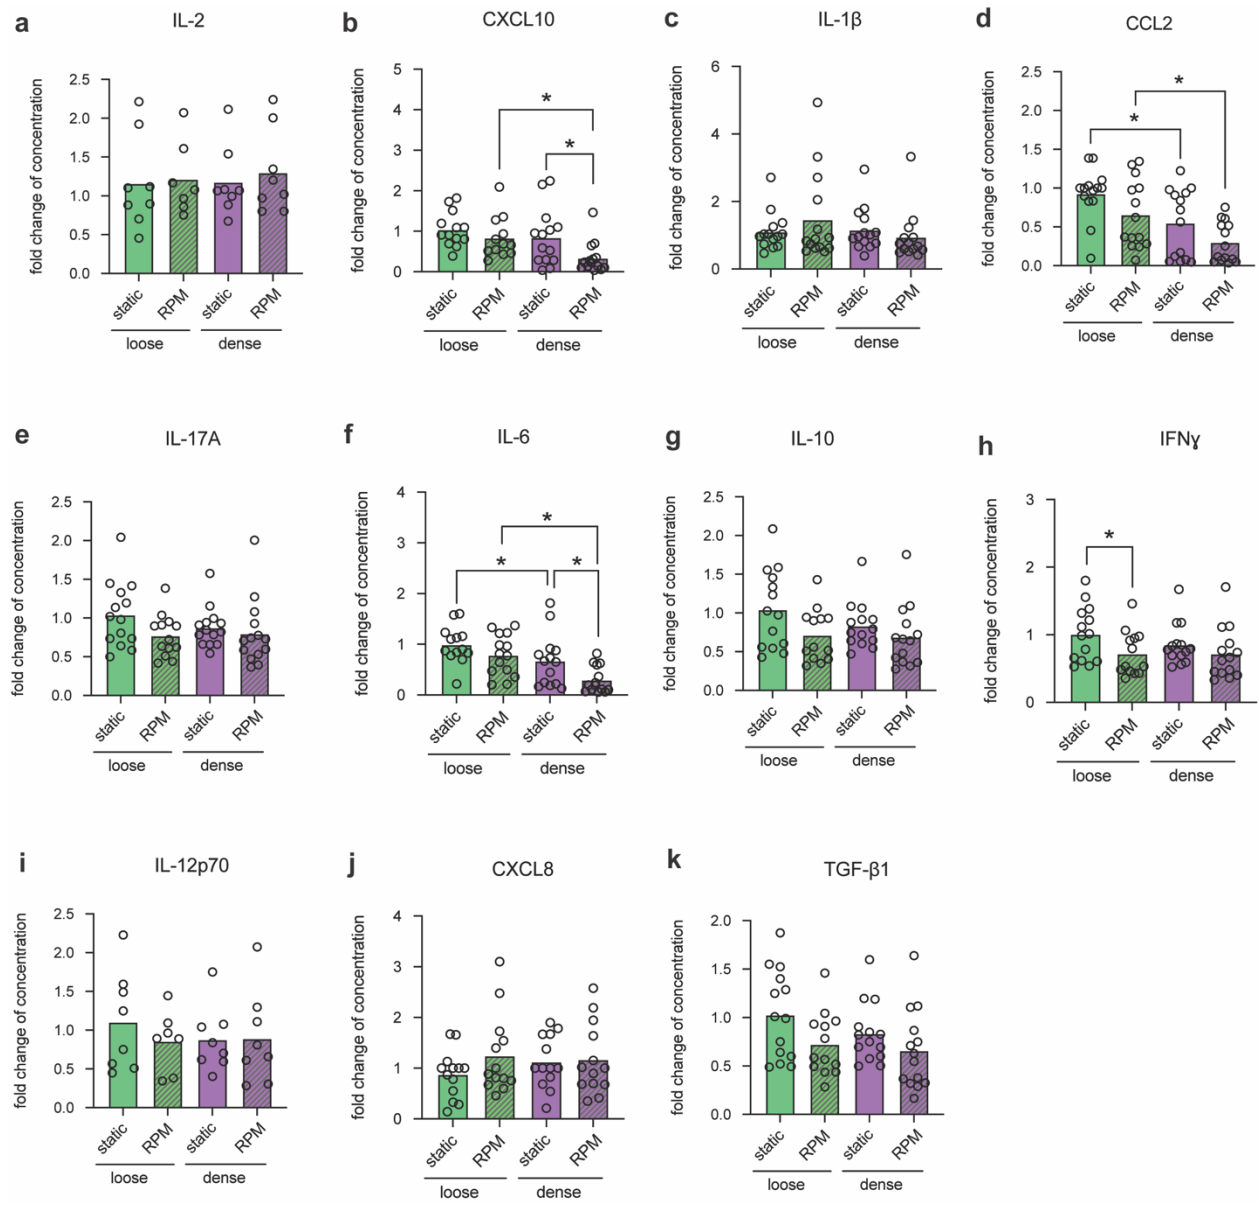

**Supplementary Figure 7:** Bar graph analysis of cytokine secretion by mDCs cultured for 3 days at static or RPM conditions in loose and dense matrices. Fold change of concentration of cytokine (pg/mL) calculated relative to samples cultured in loose matrices at static conditions. Data are shown as mean  $\pm$  SD. \* indicates significant  $p \leq 0.05$ .

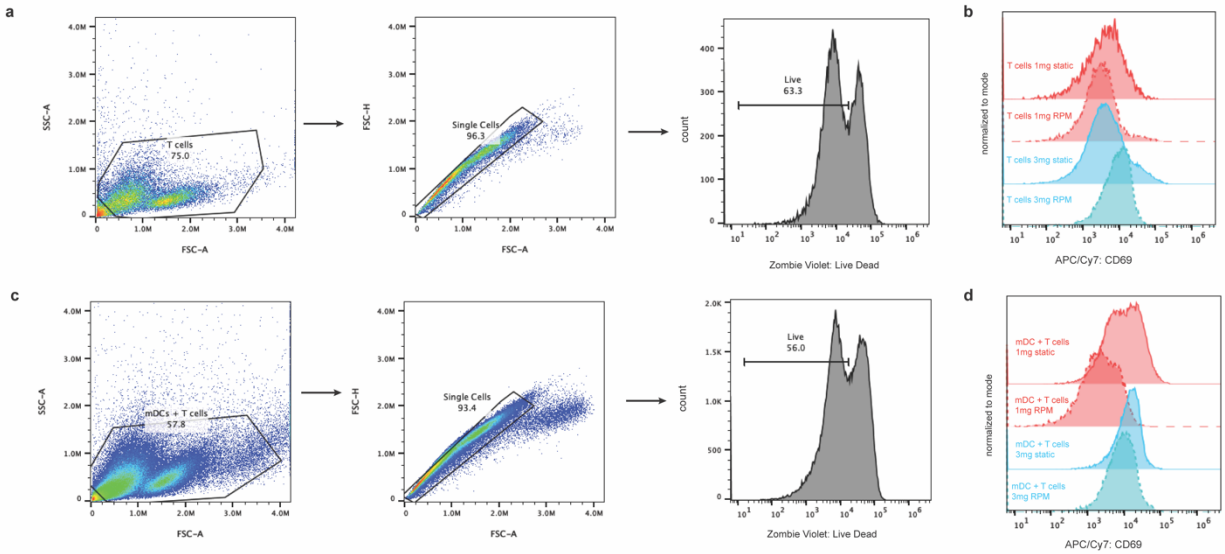

**Supplementary Figure 8: a.** Representative gating strategy for T cells alone cultured under different conditions. Initial cell population was gated on FSC and SSC to remove cell debris and dead cells. The population was then gated to isolate single cells and remove any cell aggregates. Live cells were then gated using a cell viability dye. This live population was then used in the histogram analysis. **b.** Representative fluorescent histograms of CD69 levels in T cells alone. This was used for the data analysis in Figure 6E in the manuscript. **c.** Representative gating strategy for mDCs and T cells co-cultured under different conditions. Initial cell population was gated on FSC and SSC to remove cell debris and dead cells. Live cells were then gated using a cell viability dye. This live population was then used in the histogram analysis. **d.** Representative fluorescent histograms of CD69 levels in mDCs and T cells that were co-cultured. This was used for the data analysis in Figure 6E in the manuscript.

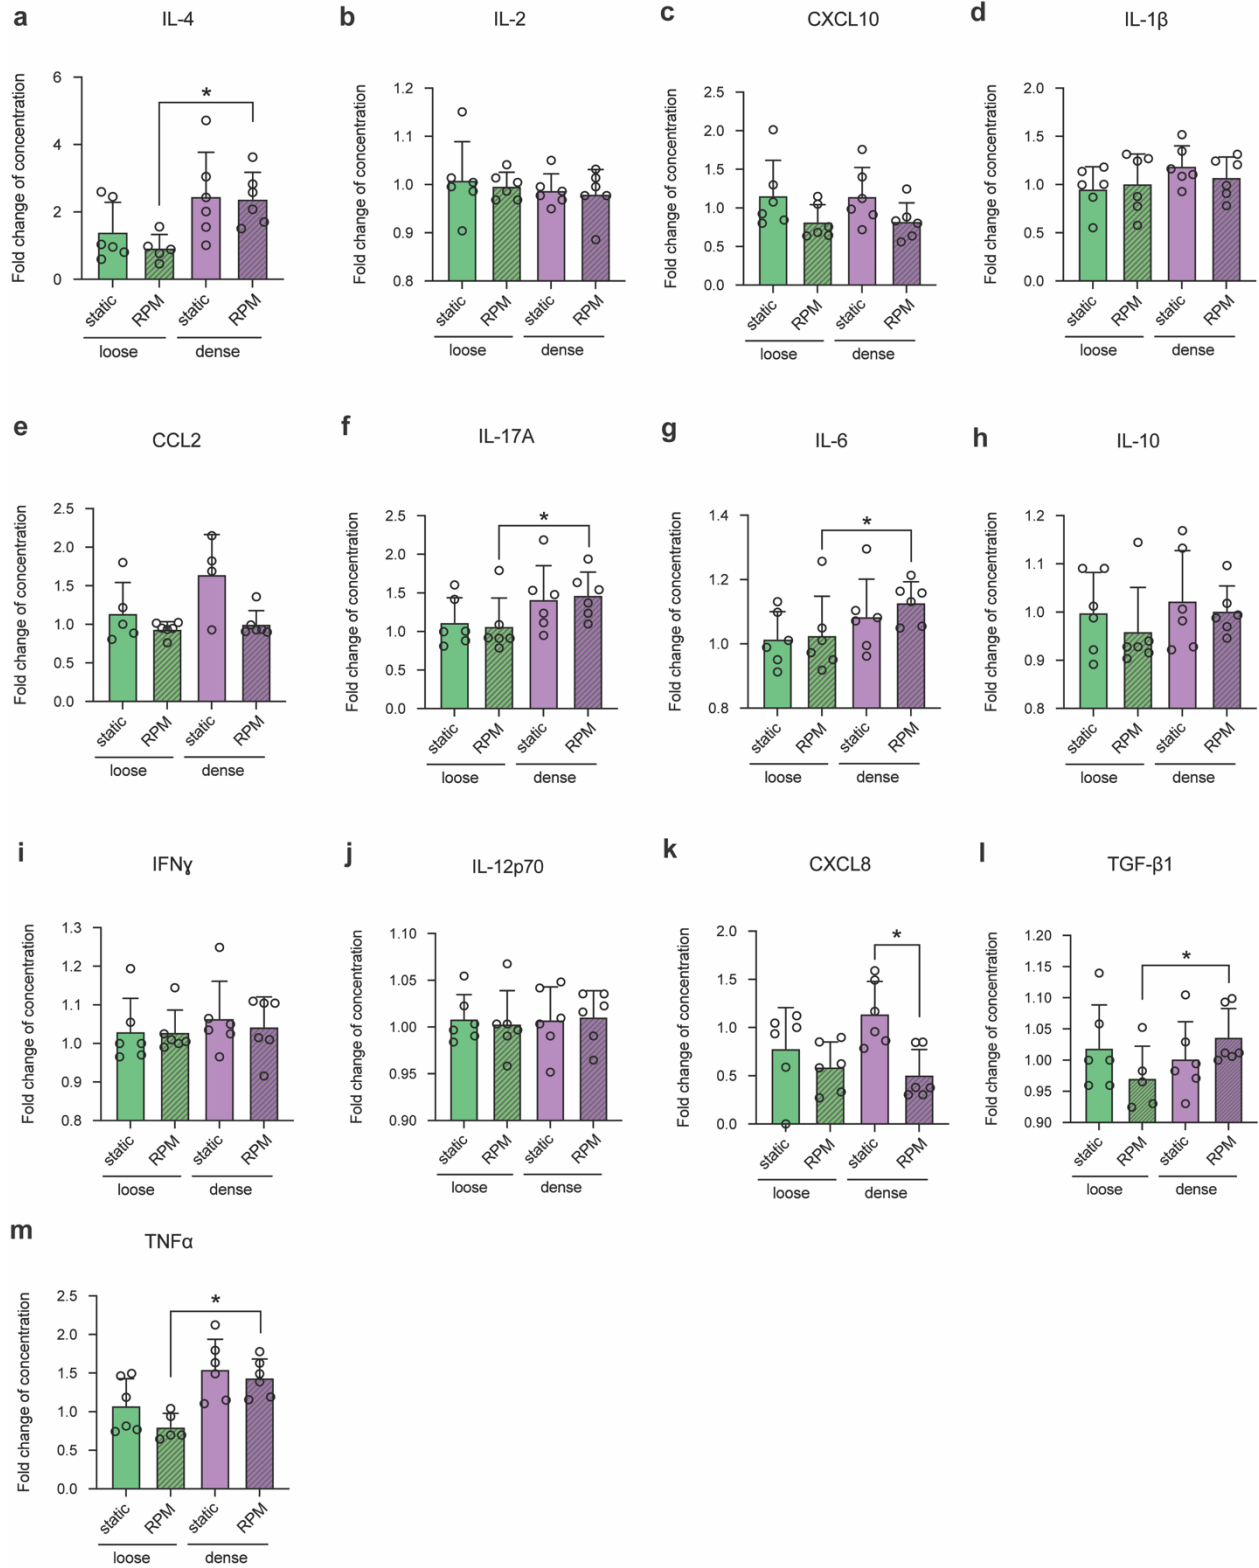

**Supplementary Figure 9:** Bar graph analysis of cytokine secretion by mDCs co-cultured with T cells for 3 days at static or RPM conditions in loose and dense matrices. Fold change of concentration of cytokine (pg/mL) calculated relative to samples cultured in loose matrices at static conditions. Data are shown as mean  $\pm$  SD. \* indicates significant  $p \leq 0.05$ .

up-regulated

|          |            |           |           |             |           |            |           |
|----------|------------|-----------|-----------|-------------|-----------|------------|-----------|
| OAZ1     | CNSK1D     | MRPL41    | CEBPA-AS1 | COL9A2      | KLC3      | GPC2       | DPY19L2P3 |
| MRFAP1   | MTHFSD     | SLC25A29  | ZBTB3     | ZNF574      | C19orf26  | CCDC153    | TLX3      |
| BRD9     | HDGFRP2    | HSPB1     | ZNF395    | HIP1R       | EPHX1     | LINC01560  | SIX3      |
| CPSF4    | STUB1      | ARRDC1    | C9orf139  | COL4A2-AS1  | DDIT4     | SPRY1      | CLDN4     |
| SRSF4    | STARD3     | TPRA1     | ATP8B3    | UBALD1      | CYB561A3  | TRIM73     | POU5F1P4  |
| PFN1     | RNF167     | QTRT1     | POLD4     | AP4M1       | EN2       | C10orf91   | TMCO2     |
| SARAF    | MAP3K14    | FLCN      | ZSCAN2    | BMF         | SYTL1     | LINC00926  | FALEC     |
| CYC1     | TNRC6C     | PTOV1     | UQC3      | SIX5        | TCHH      | PRR7       | OR4K2     |
| RCE1     | PWWP2B     | FLYWCH1   | PEX11A    | CEBPB       | MESTIT1   | ACP5       | LINC00853 |
| BCS1L    | KDM4A-AS1  | BTBD2     | FAAH      | AACSP1      | DACT3     | CLK1       | POU5F1B   |
| DPP7     | MAF1       | ZNF74     | FAM195A   | PTGDS       | HOXA7     | HSPA2      | SLC35G5   |
| PIH1D1   | FASTK      | CCNE1     | SMAD7     | SLC16A1-AS1 | CTSF      | DLK2       | POU5F2    |
| RBM10    | AP3M2      | LRG1      | ZNF696    | KLF10       | PA2G4P4   | LINC00304  | NKX2-5    |
| PSAP     | FBXO32     | SLC16A3   | LINC01002 | CROCC       | PPAP2C    | C19orf73   | IFT74-AS1 |
| RNF149   | SMO        | SRRM5     | U2AF1L4   | TMEM150B    | GDF7      | PSPN       | HEPN1     |
| GNPTG    | C11orf68   | FBXO44    | ALDH2     | GRN         | FBXL22    | C9orf172   | MTRNR2L4  |
| ATPIF1   | RAB11B-AS1 | CADM4     | PBXIP1    | PLA2G7      | LRRRC8E   | S1PR5      | FOXN3-AS2 |
| TRIP10   | ZNF383     | ZNF768    | ZNF585A   | PEX6        | TSSK6     | CTGF       | VIPR1-AS1 |
| EZR      | ZNF740     | TYSND1    | CHKB      | TUBA3FP     | DPEP2     | CYP1B1     | OOEP      |
| TMEM109  | RAB11B     | SNHG7     | TNS3      | NPB         | AOC1      | CAPN10-AS1 | RPRML     |
| TSR3     | KCNQ1OT1   | SLC3A2    | ANKZF1    | PPAN        | FAM43A    | DNM1P41    | MAS1      |
| ASB1     | AIFM3      | CDC34     | ZNF792    | RSRP1       | CCDC163P  | CENPM      | HIST3H2BB |
| GM2A     | CDIPT      | TMEM138   | ZSWIM1    | PPP1R35     | DNAJB2    | PRSS27     | SNORA25   |
| ITPR3    | TMEM150A   | C19orf25  | C1orf35   | SCN1B       | HIST1H2AC | ACY1       | LINC01574 |
| ATP6V1E2 | TOMM40     | C11orf21  | CFP       | MKNK2       | SH2B1     | GADD45G    | ZNF847P   |
| SGSM2    | C7orf26    | SP9       | CEBPB-AS1 | LINC00899   | FAM229A   | TNFRSF4    | MIR765    |
| CD3EAP   | PARP16     | TRAF2     | PIK3C2B   | KCNH2       | TNFSF14   | SEMA6B     | SNORA51   |
| LAGE3    | SIRT3      | FBXO1     | KIAA0930  | LINC01011   | CCR10     | KCNJ11     | MIR4284   |
| LAPTM5   | PTPRS      | PPOX      | SLC45A4   | P3H4        | TNFRSF25  | RAB26      | MIR6085   |
| SMG9     | CNPPD1     | PTOV1-AS2 | DISP2     | PRRG3       | MAP1A     | C16orf82   |           |

down-regulated

|          |            |           |           |          |          |         |         |          |
|----------|------------|-----------|-----------|----------|----------|---------|---------|----------|
| FCER1A   | UBE2J1     | USP53     | PLEKHA2   | MAN2A1   | NT5C2    | SLC3A1  | ADRBK2  | ABCB10   |
| MNDA     | TRG-AS1    | ACSL4     | FAR2      | TMEM167B | KIAA0020 | LYN     | LRRC40  | TLDC2    |
| CXCL11   | PNPT1      | SSR1      | GALNT1    | REV3L    | LYPLA1   | ADAM10  | PHF20L1 | SPOPL    |
| TNFSF18  | SLFN11     | ACPP      | SLC12A6   | SLC25A32 | SLC35A3  | EEA1    | PIGX    | CPT2     |
| HOPX     | NCOA7      | CDC42EP3  | APOL      | KLHL2    | ZNF430   | DDX26B  | TP53RK  | ATL3     |
| HESX1    | ITGA4      | KDELC2    | DNAJC10   | EIF5A2   | SLC33A1  | OSGIN2  | CDK17   | CBFB     |
| TNFSF10  | DUSP6      | ST3GAL5   | MAGT1     | EXOSC9   | ADCY6    | DOCK11  | CDK19   | INIP     |
| ENPP2    | CYSLTR1    | ST6GAL1   | CYB5B     | SPTLC2   | USP14    | IFT74   | IFNAR2  | MESDC2   |
| GPR183   | FUT4       | B3GNT2    | ATP2B1    | TMED5    | HS2ST1   | MTDH    | CUL4B   | ZNF791   |
| RTP4     | NUDT16P1   | LRRC8B    | LRP12     | RPL17    | SLC4A7   | PCGF5   | KCTD9   | RAB6A    |
| HPSE     | IPCEF1     | TES       | GOLT1B    | POLK     | C5orf28  | XIAP    | GORASP2 | ARID4B   |
| GCNT1    | LIMA1      | PTGES3L   | PTP4A1    | SLFN12   | PANX1    | BAZ1A   | MAN1A2  | TMEM41B  |
| APCDD1   | CBWD1      | ARL5A     | SECISBP2L | ZDHHC21  | LCP1     | SKAP2   | FAM13B  | MAPK9    |
| TIFA     | TAPT1      | TMEM2     | NT5C3A    | PARP8    | PAPD4    | GOLGA5  | ELOVL5  | EPC2     |
| DDX60L   | BLOC1S6    | LINC00641 | CXorf38   | EIF2AK3  | MTMR10   | MOB1B   | DEK     | ARHGAP26 |
| TXLNB    | NRIP3      | CCNH      | SAV1      | ARL4A    | ANKRD28  | PDLIM5  | TWSG1   | PSPC1    |
| FCGR1B   | GK         | GNB4      | MBNL1     | JAK2     | PTPRE    | TAB2    | ROCK2   | PPP3R1   |
| ARRDC3   | PROS1      | SLC8A1    | DNAJC3    | METTL21B | HDAC9    | YES1    | SYDE2   | SYNJ1    |
| SASH3    | STK17B     | MBNL1-AS1 | SLC9B2    | NDFIP2   | ARL8B    | GNE     | XPNPEP1 | FLVCR1   |
| MIR155HG | HNRNPA1P10 | PI4K2B    | GDAP1     | CD55     | UCHL5    | DHTKD1  | USP32   | WWC2     |
| CLEC12B  | TTC39B     | HIF1A     | CXorf21   | BMP2K    | ZNF280D  | KLF3    | TLK2    | TMEM65   |
| TMEM133  | AIM1       | TDRD7     | AZ12      | SLC24A1  | ZNF561   | PDIA4   | MUT     | AIDA     |
| TRIB1    | AMD1       | HSD17B12  | MGME1     | SH3GLB1  | CD2AP    | C5orf15 | AEBP2   | HIATL1   |
| RBM3     | SGMS2      | KIF17     | SSR3      | TRIM38   | MASTL    | DENND5A | EML4    | KIAA1191 |
| GLUD1P3  | LAIR1      | SHOC2     | CENPL     | TMED10   | CASS4    | LAT2    | EZH2    | PPP1R12A |
| KIAA0040 | C9orf72    | RPL36A    | NUDT4     | TMEM106B | TGS1     | DSC2    | XPR1    | USP46    |
| SLITRK4  | IGFBP7     | CHM       | PMAIP1    | SMCHD1   | CD47     | RNF139  | PPP2R2A | TMTC4    |
| FAM105A  | PCM1       | GPATCH11  | ERLEC1    | CRLF3    | DSN1     | MSL3    | LMO2    | RAB8A    |
| GBP4     | LY75       | PPARG     | TEX2      | MZT1     | RB1      | XBP1    | ZMYM5   |          |
| LPCAT2   | STARD4     | STARD8    | ACER3     | DNAJC21  | METTL4   | COA1    | NFX1    |          |

**Supplementary Figure 10:** List of genes that are up and downregulated in mDcs cultured on the RPM compared to static conditions, independently of matrix density.
